# Supplementary material for: Metabolite Biomarkers of Leishmania Antimony Resistance
Source: MDPI journal article supplement (doi:10.3390/cells10051063), 2021-04-30
Supplement: s1 [file s1]

## Supplementary Materials:

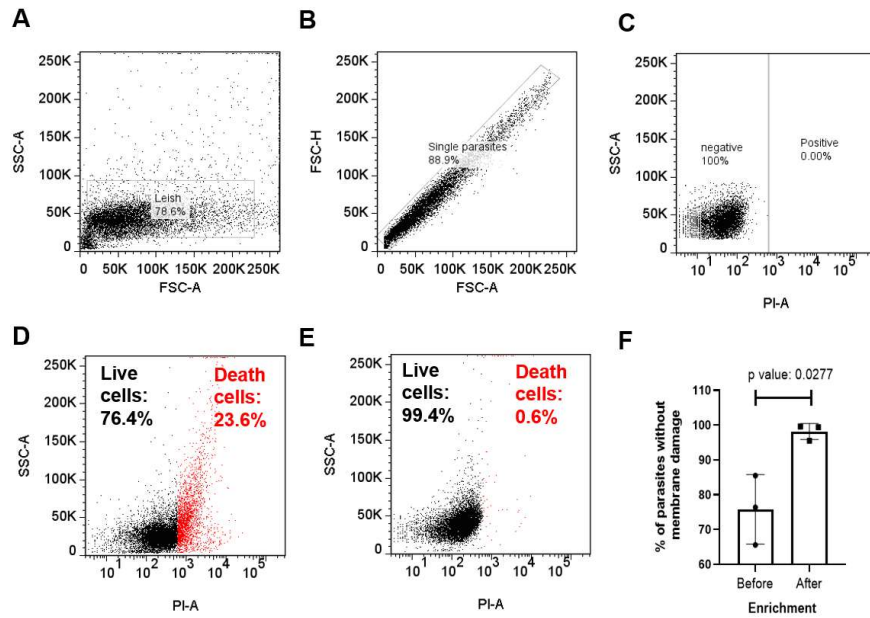

**Figure S1.** Enrichment of parasites without membrane damage for intracellular metabolomic analysis. Cell flow cytometry to estimate the enrichment of parasites without membrane damage. A) Gating Strategy for Flow Cytometry Analysis (A-E). A) *Leishmania*'s population showing heterogeneous size (FSC-A) and granularity (SSC-A). B) selection of single parasites. C) Fixing the limit to differentiate the incorporating or not of propidium iodide (PI). D) Percentage of parasites without (black dots) and with (red dots) membrane damage before Ficoll gradient centrifugation. E) Percentage of parasites without (black dots) and with (red dots) membrane damage after Ficoll gradient centrifugation. F) Bar plot comparing the percentage of parasites without membrane damage before and after treatment. Ficoll treatment significantly enriched the population of live parasites over 95%. Data normalized by log transformation. Statistical comparison by two tailed unpaired t-student. Degree of freedom: 4. 95% of confidence. Alpha  $\leq 0.05$ .

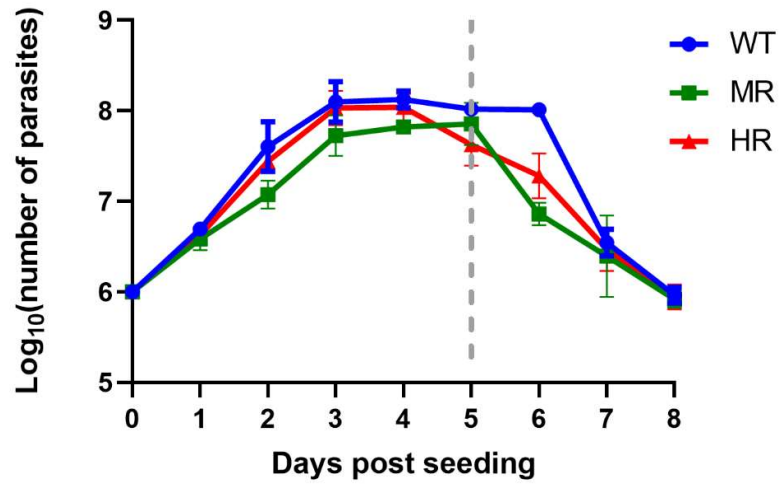

**Figure S2.** Comparison of the curves of growth between the three *L. tropica* strains. The number of parasites was counted daily using Neubauer chamber. Until the fifth-day post-seeding (stationary phase), the analyzed strains showed comparable curves of growth. WT strain (blue line). MR strain (green line). HR strain (red line). Markers (triangles, boxes or circles) represent the average of three biological replicates. Error bars show the 95% confidence intervals.

**Table S1.** Chemical shifts per compound detected in <sup>1</sup>H-NMR spectra of *Leishmania*'s intracellular extracts. Human Metabolome Database (HMDB), PubChem, Kyoto Encyclopedia of Genes and Genomes (KEGG).

| ID | Compound Name         | HMDB        | PubChem | KEGG   | Chemical Shifts [± 0.025 ppm]                                                              |
|----|-----------------------|-------------|---------|--------|--------------------------------------------------------------------------------------------|
| 1  | Valine                | HMDB0000883 | 6287    | C00183 | 7.91 (s)                                                                                   |
| 2  | Isoleucine            | HMDB0000172 | 6306    | C00407 | 1.33 (dd, J = 6.8, 1.7 Hz, 1H)                                                             |
| 3  | Propylene glycol      | HMDB0001881 | 1030    | C02912 | 3.24 (s, 1H), 3.7(m); 4.3(m)                                                               |
| 4  | 3-Hydroxyisovalerate  | HMDB0000754 | 69362   | C20827 | 1.25 (s, 1H); 2.38 (s, 1H)                                                                 |
| 5  | Lactate               | HMDB0000190 | 61503   | C00186 | 3.03 (t, J = 7.6 Hz, 1H)                                                                   |
| 6  | Alanine               | HMDB0000161 | 5950    | C00041 | 1.49 (d, J = 7.2 Hz, 5H); 3.82 – 3.77 (m, 1H)                                              |
| 7  | Arginine              | HMDB0000517 | 6322    | C00062 | 1.67 (m); 1.73 (m)                                                                         |
| 8  | Acetate               | HMDB0000042 | 176     | C00033 | 1.92(s, 1H)                                                                                |
| 9  | Proline               | HMDB0000162 | 145742  | C00148 | 1.15 (d, J = 6.5 Hz, 1H)                                                                   |
| 10 | Methionine            | HMDB0000696 | 6137    | C00073 | 9.35(s), 9.16(d), 8.84 (d, J = 8.1 Hz, 1H); 8.4(s),6.0(d);8.39(s);6.05 (d, J = 5.8 Hz, 1H) |
| 11 | Succinate             | HMDB0000254 | 1110    | C00042 | 1.05 (d, J = 7.1 Hz, 1H); 1.00 (d, J = 7.0 Hz, 1H)                                         |
| 12 | Beta-Alanine          | HMDB0000043 | 247     | C00719 | 3.91 (s, 1H), 3.27 (s, 1H)                                                                 |
| 13 | Malate                | HMDB0000156 | 222656  | C00149 | 2.1 (s, 1H)                                                                                |
| 14 | Lysine                | HMDB0000182 | 5962    | C00047 | 2.67 (dd, J = 15.4, 2.9 Hz, 0H)                                                            |
| 15 | Glycine               | HMDB0000157 | 790     | C00262 | 8.22 (s, 1H), 8.20 (s, 1H)                                                                 |
| 16 | Glycerophosphocholine | HMDB0000086 | 71920   | C00670 | 2.41 (s, 1H)                                                                               |
| 17 | Betaine               | HMDB0002199 | 10394   | C01744 | 7.19(m), 6.86(m)                                                                           |
| 18 | IMP                   | HMDB0000175 | 8582    | C00130 | 1.05 (d, J = 7.0 Hz, 1H)                                                                   |
| 19 | Fumarate              | HMDB0000123 | 750     | C00037 | 3.57 (s, 1)                                                                                |
| 20 | γ-Methylhistidine     | HMDB0000001 | 92105   | C01152 | 7.11 (s, 1H), 7.93 (s, 0H)                                                                 |
| 21 | Desaminotyrosine      | HMDB0000142 | 284     | C00058 | 8.4(s)                                                                                     |
| 22 | Xanthine              | HMDB0000292 | 1188    | C00385 | 2.56(t, J= 13.4 Hz, 2H)                                                                    |
| 23 | Hypoxanthine          | HMDB0000056 | 239     | C00099 | 8.6(s), 6.15 (d, J = 5.9 Hz, 1H), 4.5(m)                                                   |
| 24 | Formate               | HMDB0000134 | 444972  | C00122 | 6.5(s)                                                                                     |
| 25 | AMP                   | HMDB0000045 | 6083    | C00020 | 8.61(s, 1H); 6.15 (d, J = 5.9 Hz, 1H)                                                      |
| 26 | NAD+                  | HMDB0000902 | 5893    | C00003 | 4.16 – 4.12 (m, 0H), 2.22 – 1.97 (m, 1H)                                                   |

**Table S2.** Chemical shifts per compound detected in <sup>1</sup>H-NMR spectra of *Leishmania*'s extracellular extracts. Human Metabolome Database (HMDB), PubChem, Kyoto Encyclopedia of Genes and Genomes (KEGG).

| ID | Compound Name     | HMDB        | PubChem | KEGG   | Chemical Shifts [± 0.025 ppm]                             |
|----|-------------------|-------------|---------|--------|-----------------------------------------------------------|
| 1  | Leucine           | HMDB0000687 | 6106    | C00123 | 0.97 (t, J = 6.2 Hz)                                      |
| 2  | Isoleucine        | HMDB0000172 | 6306    | C00407 | 3.70 (d, J = 4.0 Hz),<br>1.02 (d, J = 7.0 Hz),<br>0.93(t) |
| 3  | Valine            | HMDB0000883 | 6287    | C00183 | 1.00 (d, J = 7.0 Hz,<br>1H), 1.05 (d, J = 7.0<br>Hz)      |
| 4  | Lactate           | HMDB0000190 | 61503   | C00186 | 1.33 (dd, J = 6.8, 1.7<br>Hz, 1H)                         |
| 5  | Threonine         | HMDB0000167 | 6288    | C00188 | 1.33(d), 4.27(m)                                          |
| 6  | Alanine           | HMDB0000161 | 5950    | C00041 | 1.49 (d, J = 7.3 Hz)                                      |
| 7  | Lysine            | HMDB0000182 | 5962    | C00047 | 3.03(t),1.7(m), 1.5(m),<br>1.4(m)                         |
| 8  | Proline           | HMDB0000162 | 145742  | C00148 | 4.14(m)                                                   |
| 9  | Glutamine         | HMDB0000641 | 5961    | C00064 | 2.46(m), 2.13(m)                                          |
| 10 | Succinate         | HMDB0000254 | 1110    | C00042 | 2.4(s)                                                    |
| 11 | Beta-Alanine      | HMDB0000056 | 239     | C00099 | 2.56(t),3.18(t)                                           |
| 12 | Malate            | HMDB0000156 | 222656  | C00149 | 2.67(dd)                                                  |
| 13 | Aspartate         | HMDB0000191 | 5960    | C00049 | 2.80 (d, J = 4.0 Hz),<br>2.83 (d, J = 4.0 Hz)             |
| 14 | Arginine          | HMDB0000517 | 6322    | C00062 | 3.25(t)                                                   |
| 15 | Glycine           | HMDB0000123 | 750     | C00037 | 3.57(s)                                                   |
| 16 | L-Serine          | HMDB0000187 | 5951    | C00065 | 3.98(dd), 3.96 (dd)                                       |
| 17 | Myoinositol       | HMDB0000211 | -       | C00137 | 4.28 (qd, J = 6.6, 4.7<br>Hz)                             |
| 18 | Trehalose         | HMDB0000975 | 7427    | C01083 | 5.21 (d, J = 3.9 Hz,<br>1H), 3.8-3.89(m)                  |
| 19 | Uracil            | HMDB0000300 | 1174    | C00106 | 5.82 (d, J = 7.7 Hz),<br>7.56 (d, J = 7.7 Hz)             |
| 20 | Fumarate          | HMDB0000134 | 444972  | C00122 | 6.52(s)                                                   |
| 21 | N-acetyl tyrosine | HMDB0000866 | 68310   | C01657 | 7.16(d), 6.88(d)                                          |
| 22 | Tyrosine          | HMDB0000158 | 6057    | C00082 | 6.9(d),7.2(d)                                             |
| 23 | Phenylalanine     | HMDB0000159 | 6140    | C00079 | 7.44(t),7.39(t),7.35(d)                                   |
| 24 | Tryptophan        | HMDB0000929 | 6305    | C00078 | 7.54(d),7.72(d)                                           |
| 25 | ¶-Methylhistidine | HMDB0000001 | 92105   | C01152 | 7.98 (s), 7.17(s)                                         |
| 26 | Hypoxanthine      | HMDB0000157 | 790     | C00262 | 8.22(s), 8.24(s)                                          |
| 27 | Formate           | HMDB0000142 | 284     | C00058 | 8.47(s)                                                   |
| 28 | Imidazole         | HMDB0001525 | 795     | C01589 | 8.36(s)                                                   |
| 29 | Nicotinate        | HMDB0001488 | 938     | C00253 | 8.95(d), 8.64(dd)                                         |

**Table S3.** Raw data from Venn diagram comparing the different and common compounds detected at the intracellular and extracellular level in *Leishmania* parasites by <sup>1</sup>H-NMR. Three groups are shown: “extracellular” representing the compounds exclusively detected at the extracellular level, “intracellular” representing the compounds exclusively detected at the intracellular level, and “extracellular and intracellular” representing the group of compounds detected in both approaches.

| Group                           | Total | Compound                 | HMDB        | PubChem | KEGG   |
|---------------------------------|-------|--------------------------|-------------|---------|--------|
| Extracellular and Intracellular | 15    | L-Isoleucine             | HMDB0000172 | 6306    | C00407 |
|                                 |       | L-Arginine               | HMDB0000517 | 6322    | C00062 |
|                                 |       | L-Valine                 | HMDB0000883 | 6287    | C00183 |
|                                 |       | Glycine                  | HMDB0000123 | 750     | C00037 |
|                                 |       | Formic acid              | HMDB0000142 | 284     | C00058 |
|                                 |       | L-Lysine                 | HMDB0000182 | 5962    | C00047 |
|                                 |       | L-Alanine                | HMDB0000161 | 5950    | C00041 |
|                                 |       | Succinic acid            | HMDB0000254 | 1110    | C00042 |
|                                 |       | Beta-Alanine             | HMDB0000056 | 239     | C00099 |
|                                 |       | L-Proline                | HMDB0000162 | 145742  | C00148 |
|                                 |       | 1-Methylhistidine        | HMDB0000001 | 92105   | C01152 |
|                                 |       | Fumaric acid             | HMDB0000134 | 444972  | C00122 |
|                                 |       | Hypoxanthine             | HMDB0000157 | 790     | C00262 |
|                                 |       | L-Lactic acid            | HMDB0000190 | 61503   | C00186 |
|                                 |       | L-Malic acid             | HMDB0000156 | 222656  | C00149 |
| Intracellular (only)            | 11    | Inosinic acid            | HMDB0000175 | 8582    | C00130 |
|                                 |       | Xanthine                 | HMDB0000292 | 1188    | C00385 |
|                                 |       | Acetic acid              | HMDB0000042 | 176     | C00033 |
|                                 |       | Propylene glycol         | HMDB0001881 | 1030    | C02912 |
|                                 |       | Desaminotyrosine         | HMDB0002199 | 10394   | C01744 |
|                                 |       | Adenosine monophosphate  | HMDB0000045 | 6083    | C00020 |
|                                 |       | Glycerophosphocholine    | HMDB0000086 | 71920   | C00670 |
|                                 |       | L-Methionine             | HMDB0000696 | 6137    | C00073 |
|                                 |       | Betaine                  | HMDB0000043 | 247     | C00719 |
|                                 |       | 3-Hydroxyisovaleric acid | HMDB0000754 | 69362   | C20827 |
|                                 |       | NAD                      | HMDB0000902 | 5893    | C00003 |
| Extracellular (only)            | 14    | L-Tryptophan             | HMDB0000929 | 6305    | C00078 |
|                                 |       | Trehalose                | HMDB0000975 | 7427    | C01083 |
|                                 |       | L-Leucine                | HMDB0000687 | 6106    | C00123 |
|                                 |       | N-Acetyl-L-tyrosine      | HMDB0000866 | 68310   | C01657 |
|                                 |       | L-Tyrosine               | HMDB0000158 | 6057    | C00082 |
|                                 |       | L-Threonine              | HMDB0000167 | 6288    | C00188 |
|                                 |       | Nicotinic acid           | HMDB0001488 | 938     | C00253 |
|                                 |       | myo-Inositol             | HMDB0000211 | -       | C00137 |
|                                 |       | L-Glutamine              | HMDB0000641 | 5961    | C00064 |
|                                 |       | Imidazole                | HMDB0001525 | 795     | C01589 |
|                                 |       | L-Aspartic acid          | HMDB0000191 | 5960    | C00049 |
|                                 |       | Uracil                   | HMDB0000300 | 1174    | C00106 |
|                                 |       | L-Serine                 | HMDB0000187 | 5951    | C00065 |
|                                 |       | L-Phenylalanine          | HMDB0000159 | 6140    | C00079 |

**Table S4.** Total compounds detected by <sup>1</sup>H-NMR in *L. tropica* distributed by the metabolites main class.

| Metabolites main class | Total | Expected | Hits | Raw p                  | Holm p                 | FDR                    |
|------------------------|-------|----------|------|------------------------|------------------------|------------------------|
| Amino acids            | 723   | 0.146    | 18   | 1.09X10 <sup>-33</sup> | 2.65X10 <sup>-31</sup> | 2.65X10 <sup>-31</sup> |
| TCA acids              | 9     | 0.001    | 3    | 6.36X10 <sup>-10</sup> | 1.55X10 <sup>-7</sup>  | 7.77X10 <sup>-8</sup>  |
| Purines                | 89    | 0.017    | 2    | 1.53X10 <sup>-4</sup>  | 0.037                  | 0.012                  |
| Disaccharides          | 9     | 0.001    | 1    | 0.001                  | 0.437                  | 0.111                  |

**Table S5.** Total compounds distributed by KEGG metabolic pathway. Expected, number of compounds expected by chance; hits, number of detected compounds matching with each metabolic pathway; Raw p, raw p-value; Holm p, adjusted p-value by Holm-Bonferroni method; FDR, false discovery rate.

| KEGG pathway                                         | Total | Expected | Hits | Raw p                  | Holm p                | FDR                   |
|------------------------------------------------------|-------|----------|------|------------------------|-----------------------|-----------------------|
| Aminoacyl-tRNA biosynthesis                          | 48    | 1.26     | 16   | 2.38X10 <sup>-15</sup> | 2X10 <sup>-13</sup>   | 2X10 <sup>-13</sup>   |
| Valine, leucine, and isoleucine biosynthesis         | 8     | 0.21     | 4    | 2.66X10 <sup>-5</sup>  | 2.21X10 <sup>-3</sup> | 1.12X10 <sup>-3</sup> |
| Arginine biosynthesis                                | 14    | 0.368    | 4    | 3.39X10 <sup>-4</sup>  | 0.028                 | 9.5X10 <sup>-3</sup>  |
| Alanine, aspartate, and glutamate metabolism         | 28    | 0.736    | 5    | 6.12X10 <sup>-4</sup>  | 0.049                 | 0.013                 |
| Glyoxylate and dicarboxylate metabolism              | 32    | 0.841    | 5    | 1.16X10 <sup>-3</sup>  | 0.093                 | 0.017                 |
| Pantothenate and CoA biosynthesis                    | 19    | 0.499    | 4    | 1.19X10 <sup>-3</sup>  | 0.094                 | 0.017                 |
| Phenylalanine, tyrosine, and tryptophan biosynthesis | 4     | 0.105    | 2    | 3.91X10 <sup>-3</sup>  | 0.305                 | 0.047                 |
| Nicotinate and nicotinamide metabolism               | 15    | 0.394    | 3    | 6.15X10 <sup>-3</sup>  | 0.474                 | 0.064                 |

**Table S6.** Comparison of statistical measures calculated for the supervised OPLS-DA models for the differentiation of Sb<sup>III</sup>-sensitive and resistant parasites at the intracellular and extracellular levels. Explained variation (R2Y). Predictive ability of the model (Q2). Total number of samples/observation (N).

| Data                                      | Outliers          | OPLS-DA scores |
|-------------------------------------------|-------------------|----------------|
| Intracellular metabolic profiling dataset | Outliers included | R2Y= 0.978     |
|                                           |                   | Q2= 0.997      |
|                                           |                   | N= 9           |
| Extracellular metabolic profiling         | Outliers included | R2Y=0.946      |
|                                           |                   | Q2=0.844       |
|                                           |                   | N=26           |

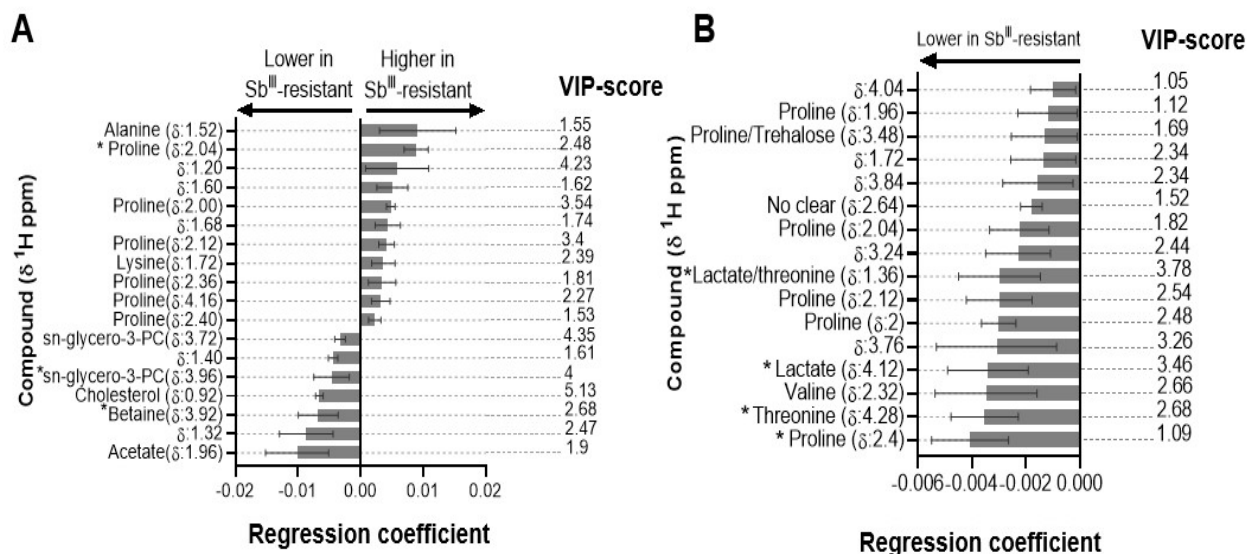

**Figure S3.** Regression coefficients and VIP scores based on the metabolomic profiling dataset for the OPLS-DA models comparing Sb<sup>III</sup> resistant parasites versus Sb<sup>III</sup> sensitive parasites. Chemical shift ( $\delta$ ) and or assigned metabolites are represented in the Y-axis, while the regression coefficient is plotted in the X-axis. A) Intracellular extracts. B) Extracellular extracts. Positive values of coefficients (right-facing bars) indicate increased metabolite in Sb<sup>III</sup> resistant parasites (fold change>1) while negative values (left-facing bars) represent a decrease in metabolite concentrations (fold change<1). Only significant metabolite/protein-mediator are shown (p<0.05; jackknife technique).

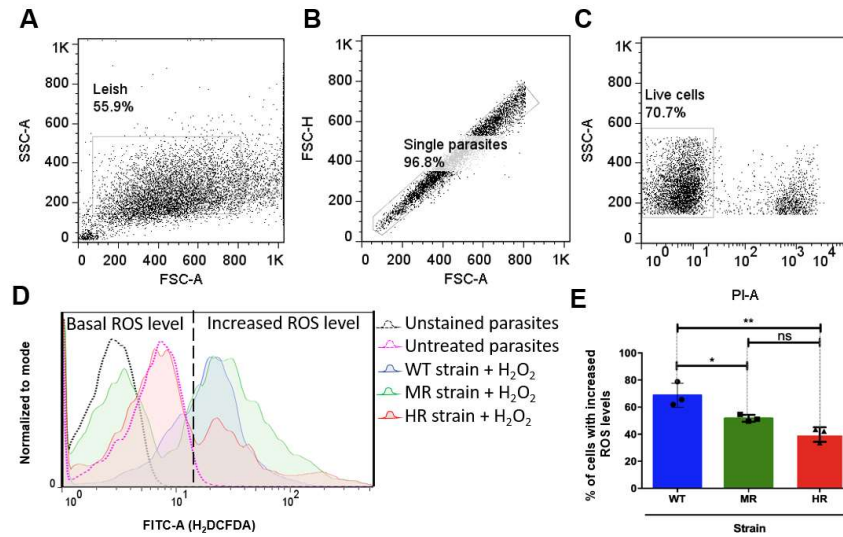

**Figure S4.** Sb<sup>III</sup> resistant parasites show better tolerance to oxidative stress induced by hydrogen peroxide. Gating Strategy for Flow Cytometry Analysis (A-D). A) *Leishmania*'s population showing heterogeneous size (FSC-A) and granularity (SSC-A). B) selection of single parasites. C) Selection of parasites without membrane damage or propidium iodide (PI) incorporation. D) Intracellular ROS levels quantified as the incorporation of the H<sub>2</sub>DCFDA probe. The basal level of ROS was fixed based on untreated parasites or control group. Under H<sub>2</sub>O<sub>2</sub> treatment, Sb<sup>III</sup>-sensitive (WT) parasites were mostly distributed in the region of parasites with high ROS levels (right panel), high resistant (HR) parasites, were mostly distributed in the region of lower ROS levels (left panel), while moderately resistant (MR) parasites were almost equally distributed between two panels. E) Statistical analysis comparing the percentage of parasites with increased ROS level per experimental condition. The bars represent the averaged cell number producing higher ROS levels under H<sub>2</sub>O<sub>2</sub> exposure. Three independent biological replicates were done in each experimental condition. WT strain (blue bar). MR strain (green bar). HR strain (red bar). Statistical analysis included ANOVA one way followed by Tukey's multiple comparisons test. p-value > 0.05 (ns), p-value ≤ 0.05 (\*), ≤ 0.01 (\*\*). Forward scatter area (FSC-A). Forward scatter height (FSC-H). Side scatter area SSC-A.
